# Supplementary material for: The effectiveness of pharmacological agents for the treatment of uveitic macular oedema (UMO): a systematic review protocol
Source: Springer Nature journal article supplement (doi:10.1186/s13643-016-0203-y), 2016-02-13
Supplement: MOESM1 [file 9787746]

## Additional file 1

| PRISMA-P 2015 checklist: recommended items to include in a systematic review protocol <sup>a</sup> |        |        |                                                                                                                                                                                                                                             |
|----------------------------------------------------------------------------------------------------|--------|--------|---------------------------------------------------------------------------------------------------------------------------------------------------------------------------------------------------------------------------------------------|
| Section/topic                                                                                      | Item # | Page # | Checklist item                                                                                                                                                                                                                              |
| <b>ADMINISTRATIVE INFORMATION</b>                                                                  |        |        |                                                                                                                                                                                                                                             |
| <b>Title</b>                                                                                       |        |        |                                                                                                                                                                                                                                             |
| <b>Identification</b>                                                                              | 1a     | 1      | Identify the report as a protocol of a systematic review                                                                                                                                                                                    |
| <b>Update</b>                                                                                      | 1b     | NA     | If the protocol is for an update of a previous systematic review, identify as such                                                                                                                                                          |
| <b>Registration</b>                                                                                | 2      | 2      | If registered, provide the name of the registry (e.g., PROSPERO) and registration number                                                                                                                                                    |
| <b>Authors</b>                                                                                     |        |        |                                                                                                                                                                                                                                             |
| <b>Contact</b>                                                                                     | 3a     | 1      | Provide name, institutional affiliation, and e-mail address of all protocol authors; provide physical mailing address of corresponding author                                                                                               |
| <b>Contributions</b>                                                                               | 3b     | 14     | Describe contributions of protocol authors and identify the guarantor of the review                                                                                                                                                         |
| <b>Amendments</b>                                                                                  | 4      | NA     | If the protocol represents an amendment of a previously completed or published protocol, identify as such and list changes; otherwise, state plan for documenting important protocol amendments                                             |
| <b>Support</b>                                                                                     |        |        |                                                                                                                                                                                                                                             |
| <b>Sources</b>                                                                                     | 5a     | 14     | Indicate sources of financial or other support for the review                                                                                                                                                                               |
| <b>Sponsor</b>                                                                                     | 5b     | 14     | Provide name for the review funder and/or sponsor                                                                                                                                                                                           |
| <b>Role of sponsor/funder</b>                                                                      | 5c     | 14     | Describe roles of funder(s), sponsor(s), and/or institution(s), if any, in developing the protocol                                                                                                                                          |
| <b>INTRODUCTION</b>                                                                                |        |        |                                                                                                                                                                                                                                             |
| <b>Rationale</b>                                                                                   | 6      | 2      | Describe the rationale for the review in the context of what is already known                                                                                                                                                               |
| <b>Objectives</b>                                                                                  | 7      | 5      | Provide an explicit statement of the question(s) the review will address with reference to participants, interventions, comparators, and outcomes (PICO)                                                                                    |
| <b>METHODS</b>                                                                                     |        |        |                                                                                                                                                                                                                                             |
| <b>Eligibility criteria</b>                                                                        | 8      | 7      | Specify the study characteristics (e.g., PICO, study design, setting, time frame) and report characteristics (e.g., years considered, language, publication status) to be used as criteria for eligibility for the review                   |
| <b>Information sources</b>                                                                         | 9      | 6-7    | Describe all intended information sources (e.g., electronic databases, contact with study authors, trial registers, or other grey literature sources) with planned dates of coverage                                                        |
| <b>Search strategy</b>                                                                             | 10     | 6-7    | Present draft of search strategy to be used for at least one electronic database, including planned limits, such that it could be repeated                                                                                                  |
| <b>Study records</b>                                                                               |        |        |                                                                                                                                                                                                                                             |
| <b>Data management</b>                                                                             | 11a    | 8      | Describe the mechanism(s) that will be used to manage records and data throughout the review                                                                                                                                                |
| <b>Selection process</b>                                                                           | 11b    | 8      | State the process that will be used for selecting studies (e.g., two independent reviewers) through each phase of the review (i.e., screening, eligibility, and inclusion in meta-analysis)                                                 |
| <b>Data collection process</b>                                                                     | 11c    | 8      | Describe planned method of extracting data from reports (e.g., piloting forms, done independently, in duplicate), any processes for obtaining and confirming data from investigators                                                        |
| <b>Data items</b>                                                                                  | 12     | 9      | List and define all variables for which data will be sought (e.g., PICO items, funding sources), any pre-planned data assumptions and simplifications                                                                                       |
| <b>Outcomes and prioritization</b>                                                                 | 13     | 8      | List and define all outcomes for which data will be sought, including prioritization of main and additional outcomes, with rationale                                                                                                        |
| <b>Risk of bias in individual studies</b>                                                          | 14     | 10     | Describe anticipated methods for assessing risk of bias of individual studies, including whether this will be done at the outcome or study level, or both; state how this information will be used in data synthesis                        |
| <b>Data</b>                                                                                        |        |        |                                                                                                                                                                                                                                             |
| <b>Synthesis</b>                                                                                   | 15a    | 10     | Describe criteria under which study data will be quantitatively synthesized                                                                                                                                                                 |
|                                                                                                    | 15b    | 11     | If data are appropriate for quantitative synthesis, describe planned summary measures, methods of handling data, and methods of combining data from studies, including any planned exploration of consistency (e.g., $I^2$ , Kendall's tau) |
|                                                                                                    | 15c    | 11     | Describe any proposed additional analyses (e.g., sensitivity or subgroup analyses, meta-regression)                                                                                                                                         |
|                                                                                                    | 15d    | 11     | If quantitative synthesis is not appropriate, describe the type of summary planned                                                                                                                                                          |
| <b>Meta-bias(es)</b>                                                                               | 16     | 11-12  | Specify any planned assessment of meta-bias(es) (e.g., publication bias across studies, selective reporting within studies)                                                                                                                 |
| <b>Confidence in cumulative evidence</b>                                                           | 17     | NA     | Describe how the strength of the body of evidence will be assessed (e.g., GRADE)                                                                                                                                                            |

PRISMA-P Preferred Reporting Items for Systematic review and Meta-Analysis Protocols.
